# Supplementary material for: Neddylation Facilitates the Antiviral Response in Zebrafish
Source: PubMed Central journal article supplement (PMC6603152; doi:10.3389/fimmu.2019.01432), 2019-06-25

**Supplemental Table S1.** The primer sequences (Liu et al., *J. Immunology*, 2016, 197:4736)

| <b>Primer</b>                       | <b>Sequence (5' to 3')</b> |
|-------------------------------------|----------------------------|
| zebrafish <i>ifn1</i> -F            | GAGCACATGAACTCGGTGAA       |
| zebrafish <i>ifn1</i> -R            | TGCGTATCTTGCCACACATT       |
| zebrafish <i>ifn2</i> -F            | CCTCTTTGCCAACGACAGTT       |
| zebrafish <i>ifn2</i> -R            | CGGTTCTTGAGCTCTCATC        |
| zebrafish <i>rsad</i> -F            | AGCAGATCACCGCTCTCAAT       |
| zebrafish <i>rsad</i> -R            | CCAGACACTGGATGCTCTGA       |
| zebrafish <i>mxh</i> -F             | AATGGTGATCCGCTATCTGC       |
| zebrafish <i>mxh</i> -R             | TCTGGCGGCTCAGTAAGTTT       |
| zebrafish <i>mxr</i> -F             | GAGGCTTCACTTGGCAACTC       |
| zebrafish <i>mxr</i> -R             | TTGTTCCAATAAGGCCAAGC       |
| zebrafish <i>pkz</i> -F             | GGAGCACCGTACAGGACATT       |
| zebrafish <i>pkz</i> -R             | CTCGGGCTTTATTTGCTCTG       |
| zebrafish <i>mavs</i> -F            | GTTCCCGGTCCAAGACACTA       |
| zebrafish <i>mavs</i> -R            | TTGTGCGCTGAGTTGTTCTG       |
| zebrafish <i>rig1</i> -F            | TTGAGGAGCTGCATGAACAC       |
| zebrafish <i>rig1</i> -R            | CCGCTTGAATCTCCTCAGAC       |
| zebrafish <i>lta</i> -F             | AAGCCAAACGAAGGTCA          |
| zebrafish <i>lta</i> -R             | AACCCATTTTCAGCGATTGTC      |
| zebrafish $\beta$ - <i>actin</i> -F | TACAATGAGCTCCGTGTTGC       |
| zebrafish $\beta$ - <i>actin</i> -R | ACATACAATGGCAGGGGTGTT      |
| EPC- <i>ifn</i> -F                  | ATGAAAACTCAAATGTGGACGTA    |
| EPC- <i>ifn</i> -R                  | GATAGTTTCCACCCATTTCTTAA    |
| EPC- <i>isg15</i> -F                | CAGCCTTGAGGATGATTCCAG      |
| EPC- <i>isg15</i> -R                | TGCCGTTGTAAATCAGTCG        |
| EPC- <i>viperin</i> -F              | AGCGAGGCTTACGACTTCTG       |
| EPC- <i>viperin</i> -R              | GCACCAACTCTCCAGAAAA        |
| EPC- $\beta$ 2M-RT-F                | CTCCATTGAACTGCTGAAAGATG    |
| EPC- $\beta$ 2M-RT-R                | CAAATAACTGTCTTCATTTGCTCAT  |
| EPC- $\beta$ - <i>actin</i> -F      | CACTGTGCCCATCTACGAG        |
| EPC- $\beta$ - <i>actin</i> -R      | CCATCTCCTGCTCGAAGTC        |
| SVCV- <i>P</i> protein-F            | TTGGACCTGGGATAGTGA         |
| SVCV- <i>P</i> protein-R            | CTTGCTTGTTTGTGGG           |
| SVCV- <i>G</i> protein-F            | CGACCTGGATTAGACTTG         |
| SVCV- <i>G</i> protein-R            | AATGTTCGGTTTCTCACT         |
| SVCV- <i>N</i> protein-F            | TGAGGTGAGTGCTGAGGATG       |
| SVCV- <i>N</i> protein-R            | CCATCAGCAAAGTCCGGTAT       |

## Supplemental Figure Legends

### Supplemental Figure S1. MLN4924 inhibits the expression of *ifn1* and *pkz* in zebrafish larvae upon SVCV infection.

(A-B) Zebrafish larvae (3 dpf) were pretreated with different dosage of MLN4924 for 24 h, and then were infected with SVCV (+SVCV) or PBS control (-SVCV). The expression of *ifn1* and *pkz* was examined by qRT-PCR.

### Supplemental Figure S2. Generation of *nedd8*-null zebrafish via CRISPR/Cas9 technology.

(A) Scheme of the genomic structure of zebrafish *nedd8* and the sequence information in mutant *nedd8* zebrafish (mutant1: *nedd8*<sup>ihb1227/ihb1227</sup>, in which 4 bp was deleted in exon 3). (B) The sequence information of targeting sites (the blank line) in wild type (WT) and mutant *nedd8* allele. Upper panel: the sequence of the Cas9 target site is indicated with a black line and the *nedd8* mutant allele are shown. The red dashed line indicates the deleted nucleotide. (C) The predicted protein of *nedd8* in WT and the mutant. (D) The *nedd8* mRNA level in spleens from the *nedd8*<sup>+/+</sup> or the *nedd8*-null mutant (*nedd8*<sup>ihb1227/1227</sup>) (4 mpf ; n=3, respectively ). (E) The Nedd8 protein in WT and the mutant larvae (3 dpf). Mpf, month post fertilization. Data are presented as means  $\pm$  SEM of three independent experiments, performed in triplicate.

### Supplemental Figure S3. Neddylation does not targets Mda5, Mavs and Tbk1.

(A-C) HEK 293T cells were transfected with the indicated plasmids together with His-*nedd8* respectively (5  $\mu$ g/each). After 36 hr, cells were lysed in guanidinium chloride, and His-*nedd8* was purified with Ni<sup>2+</sup>-NTA agarose. TCL, total cell lysates; IP, immunoprecipitation.

## Supplemental Figure S1.

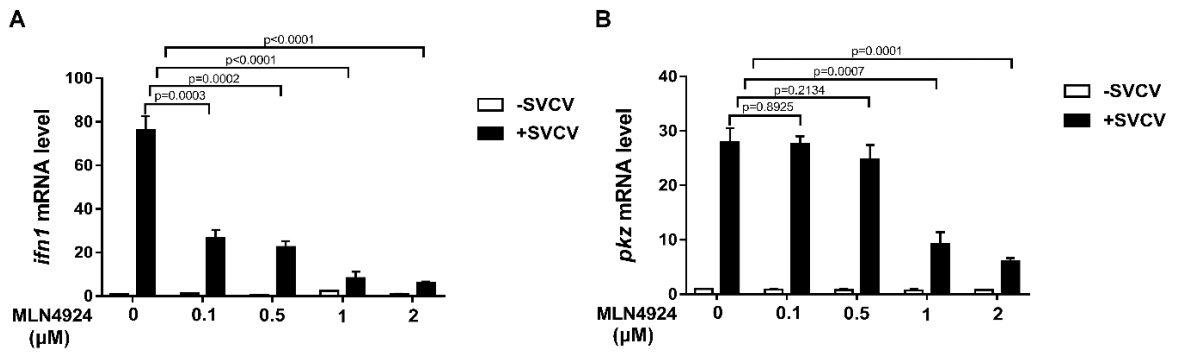

## Supplemental Figure S2.

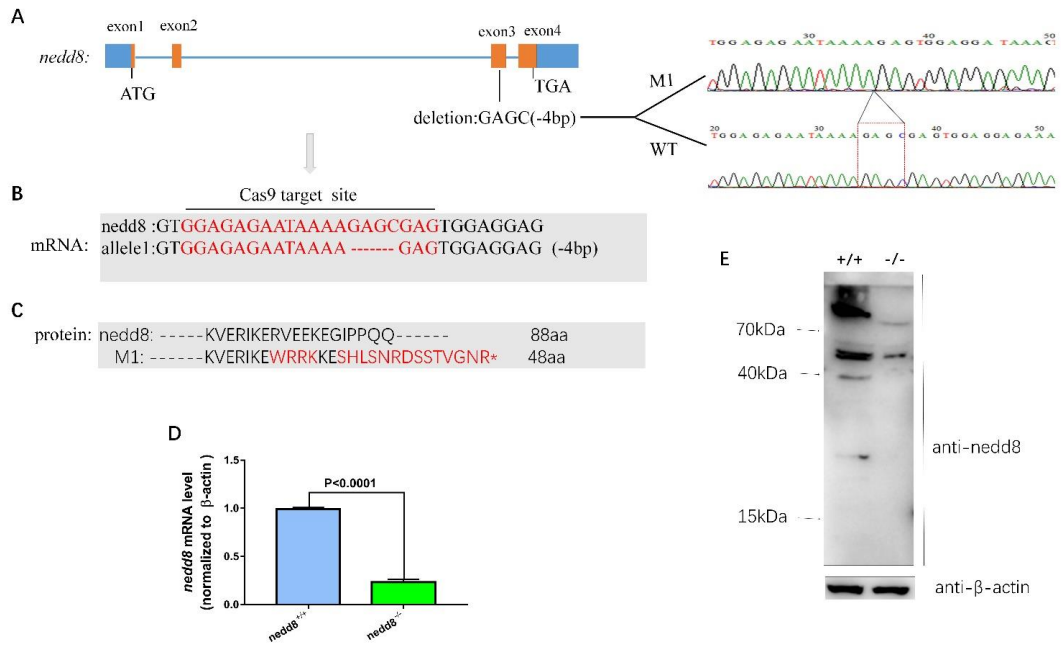

**Supplemental Figure S3.**

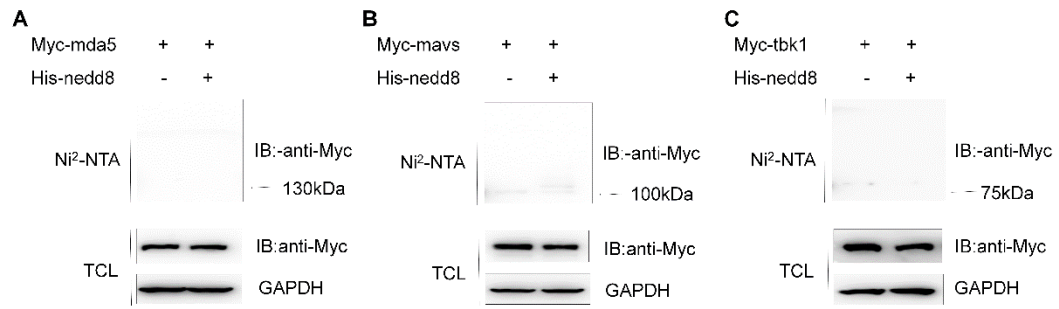

Supplement: Data_Sheet_1.pdf [file Data_Sheet_1.pdf]
